# Supplementary material for: Enhanced polarization and dielectricity in BaTiO3:NiO nanocomposite films modulated by the microstructure
Source: Royal Society of Chemistry journal article supplement (doi:10.1039/c7ra06627a), 2017-01-01
Supplement: c7ra06627a1.pdf [file c7ra06627a1.pdf]

## Supplementary Information

### **Enhanced Polarization and dielectricity in BaTiO<sub>3</sub>:NiO nanocomposite films modulated by the microstructure**

*Mingjing Chen, Xingkun Ning\*, Shufang Wang\* and Guangsheng Fu*

Hebei Key Lab of Optic-electronic Information and Materials, The College of Physical Science and  
Technology, Hebei University, 180 Wusi Road, Baoding 071002, China

E-mail: [xkning@alum.imr.ac.cn](mailto:xkning@alum.imr.ac.cn); [sfwang@hbu.edu.cn](mailto:sfwang@hbu.edu.cn)

**Table S1. Deposition parameters and their levels**

| Factors                                  | levels                                                           |
|------------------------------------------|------------------------------------------------------------------|
| Substrate                                | Nb:SrTiO <sub>3</sub> with 0.7 wt % of Nb, abbreviated as Nb:STO |
| Substrate temperature(°C)                | 630                                                              |
| O <sub>2</sub> gass pressure (mbar)      | 0.2                                                              |
| Target-substrate distance (mm)           | 35                                                               |
| Laser fluence (J/cm <sup>2</sup> )       | 1.2                                                              |
| Laser frequency (J/cm <sup>2</sup> , Hz) | 2                                                                |

**Table S2. Targets parameters and their synthesized materials**

| Target                                                                                                                 | Powers of materials      |
|------------------------------------------------------------------------------------------------------------------------|--------------------------|
| (BaTiO <sub>3</sub> ) <sub>0.9</sub> :(NiO) <sub>0.1</sub> , abbreviated as (BTO) <sub>0.9</sub> :(NiO) <sub>0.1</sub> | BaTiO <sub>3</sub> , NiO |
| (BaTiO <sub>3</sub> ) <sub>0.8</sub> :(NiO) <sub>0.2</sub> , abbreviated as (BTO) <sub>0.8</sub> :(NiO) <sub>0.2</sub> | BaTiO <sub>3</sub> , NiO |
| BaTiO <sub>3</sub> , abbreviated as BTO                                                                                | BaTiO <sub>3</sub>       |
| NiO                                                                                                                    | NiO                      |

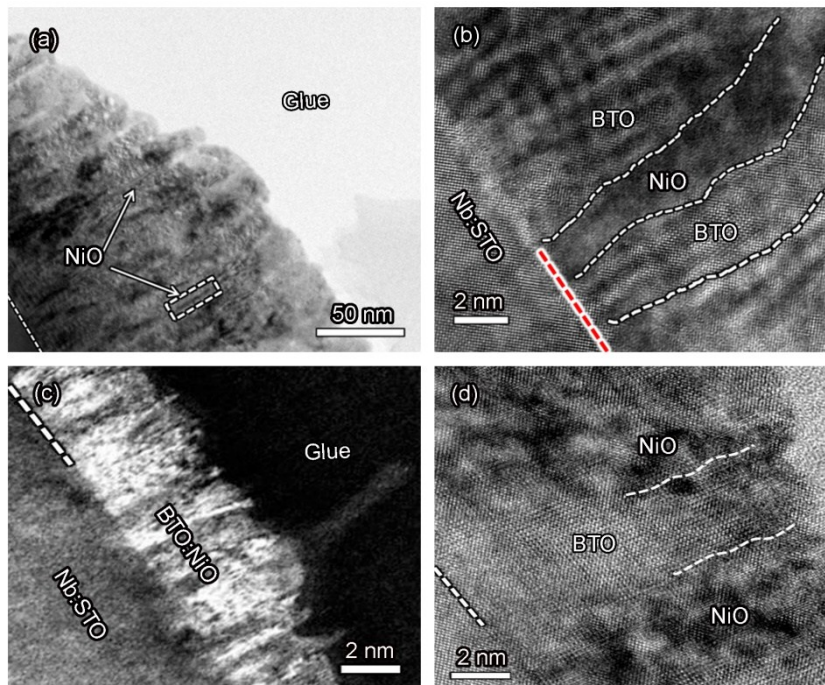

**Figure S1.** (a) TEM and (b) and(d) HRTEM images for the BTO:NiO with nanomultilayers structure for the film C-2. (c) HADDF images for the films of C-2.

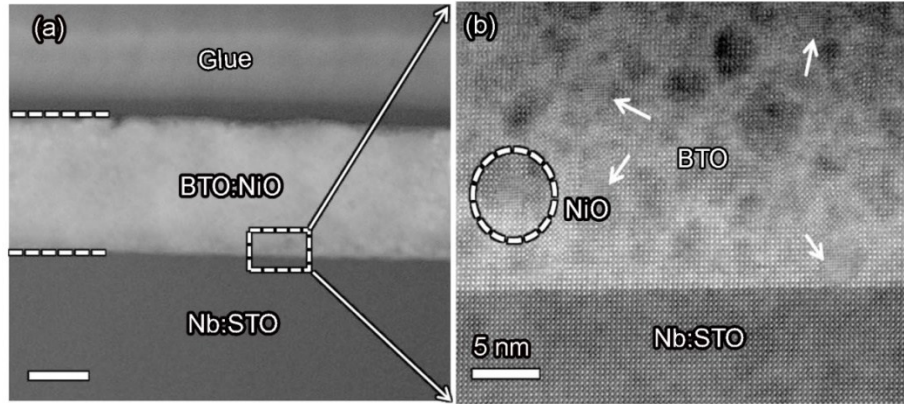

**Figure S2.** STEM and HR-STEM images for the BTO:NiO with nanogranular structure of the sample G-1.

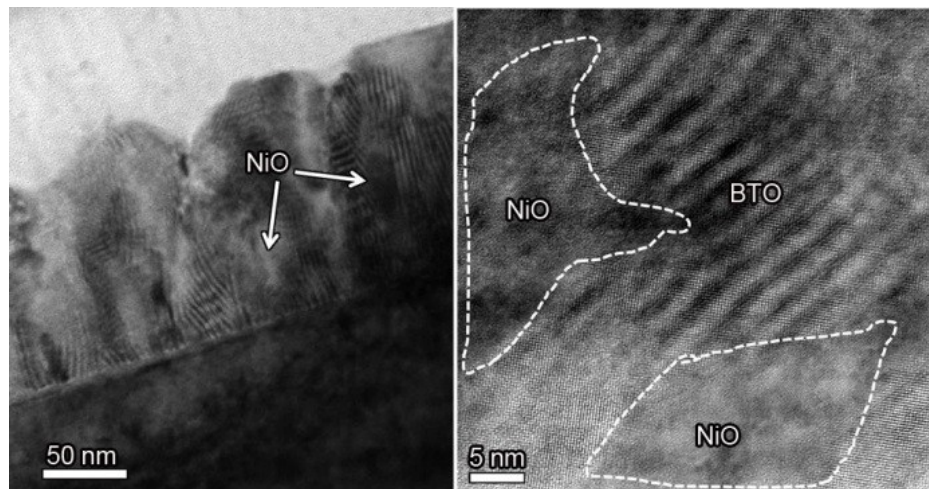

**Figure S3.** TEM and HRTEM images for the BTO:NiO with nanogranular structure for the film G-2.
